# Supplementary material for: Workplace Bullying and Suicidal Ideation: Findings from an Australian Longitudinal Cohort Study of Mid-Aged Workers
Source: Int J Environ Res Public Health. 2020 Feb 24;17(4):1448. doi: 10.3390/ijerph17041448 (PMC7068571; doi:10.3390/ijerph17041448)
Supplement: Supplementary file 1 [file ijerph-17-01448-s001.pdf]

## Supplementary Material

**Table S1.** Odds (95% CI) of suicidal active and passive ideation associated with the ‘self-labelling’ measure of workplace bullying.

|                                  | <b>Model 1<sup>a</sup></b><br><b>(unadjusted)</b> | <b>Model 2<sup>b</sup></b><br><b>(with socio-demographic and</b><br><b>health covariates)</b> | <b>Model 3<sup>c</sup></b><br><b>(with socio-demographic, health, and</b><br><b>current and prior work covariates)</b> | <b>Model 4<sup>d</sup></b><br><b>(excluding those with prior</b><br><b>suicidal ideation)</b> |
|----------------------------------|---------------------------------------------------|-----------------------------------------------------------------------------------------------|------------------------------------------------------------------------------------------------------------------------|-----------------------------------------------------------------------------------------------|
| Workplace bullying               |                                                   |                                                                                               |                                                                                                                        |                                                                                               |
| Never bullied (ref.)             | 1.00                                              | 1.00                                                                                          | 1.00                                                                                                                   | 1.00                                                                                          |
| Currently bullied                | <b>2.37</b><br><b>(1.37–4.11)</b>                 | <b>2.15 (1.19–3.89)</b>                                                                       | <b>1.89 (1.01–3.52)</b>                                                                                                | 1.09 (0.42–2.84)                                                                              |
| Previously in current workplace  | <b>1.81</b><br><b>(1.18–2.77)</b>                 | <b>1.79 (1.14–2.81)</b>                                                                       | <b>1.66 (1.04–2.65)</b>                                                                                                | 1.31 (0.70–2.46)                                                                              |
| Previously in previous workplace | <b>2.27</b><br><b>(1.57–3.30)</b>                 | <b>2.30 (1.55–3.42)</b>                                                                       | <b>2.23 (1.47–3.37)</b>                                                                                                | <b>2.52 (1.50–4.24)</b>                                                                       |
| Cannot say                       | 0.94<br>(0.39–2.27)                               | 0.83 (0.32–2.15)                                                                              | 0.66 (0.23–1.93)                                                                                                       | 0.89 (0.26–3.04)                                                                              |
| Sex                              |                                                   |                                                                                               |                                                                                                                        |                                                                                               |
| Male (ref.)                      |                                                   | 1.00                                                                                          | 1.00                                                                                                                   | 1.00                                                                                          |
| Female                           |                                                   | 0.92 (0.65–1.29)                                                                              | 0.91 (0.64–1.31)                                                                                                       | 1.28 (0.80–2.06)                                                                              |
| Age (years)                      |                                                   | 0.95 (0.85–1.07)                                                                              | 0.94 (0.84–1.06)                                                                                                       | 0.93 (0.80–1.07)                                                                              |
| Education (years)                |                                                   | 1.07 (0.98–1.17)                                                                              | 1.06 (0.97–1.17)                                                                                                       | 1.05 (0.93–1.18)                                                                              |
| Partner                          |                                                   |                                                                                               |                                                                                                                        |                                                                                               |
| Yes                              |                                                   | 0.83 (0.55–1.27)                                                                              | 0.84 (0.54–1.30)                                                                                                       | 0.79 (0.44–1.42)                                                                              |
| No (ref.)                        |                                                   | 1.00                                                                                          | 1.00                                                                                                                   | 1.00                                                                                          |
| Weekly household income          |                                                   |                                                                                               |                                                                                                                        |                                                                                               |
| <\$1,075                         |                                                   | <b>1.82 (1.04–3.18)</b>                                                                       | 1.64 (0.90–2.97)                                                                                                       | 1.24 (0.56–2.74)                                                                              |
| <\$1,700                         |                                                   | 1.52 (0.95–2.44)                                                                              | 1.53 (0.94–2.5)                                                                                                        | 1.46 (0.77–2.74)                                                                              |
| <\$2,400                         |                                                   | 0.87 (0.55–1.40)                                                                              | 0.86 (0.53–1.39)                                                                                                       | 0.67 (0.35–1.30)                                                                              |
| \$2,400+ (ref.)                  |                                                   | 1.00                                                                                          | 1.00                                                                                                                   | 1.00                                                                                          |
| Missing/not reported             |                                                   | 1.34 (0.58–3.06)                                                                              | 0.97 (0.38–2.47)                                                                                                       | 0.70 (0.20–2.45)                                                                              |
| Employment status                |                                                   |                                                                                               |                                                                                                                        |                                                                                               |

|                                       |                  |                         |                         |
|---------------------------------------|------------------|-------------------------|-------------------------|
| Full-time (ref.)                      | 1.00             | 1.00                    | 1.00                    |
| Part-time                             | 1.08 (0.71–1.64) | 1.00 (0.65–1.56)        | 1.04 (0.59–1.85)        |
| Employment sector                     |                  |                         |                         |
| Public sector                         | 1.00             | 1.00                    | 1.00                    |
| (Commonwealth) (ref.)                 |                  |                         |                         |
| Public sector                         | 0.82 (0.51–1.33) | 0.79 (0.48–1.30)        | 0.59 (0.30–1.19)        |
| (State/Territory)                     |                  |                         |                         |
| Private sector                        | 0.81 (0.53–1.22) | 0.75 (0.49–1.16)        | 0.71 (0.40–1.24)        |
| Not for profit/other                  | 0.62 (0.36–1.06) | 0.59 (0.34–1.02)        | 0.58 (0.29–1.17)        |
| Occupational skill level              |                  |                         |                         |
| Professional (ref.)                   | 1.00             | 1.00                    | 1.00                    |
| Semi-professional                     | 1.49 (0.95–2.35) | 1.50 (0.94–2.42)        | 1.05 (0.55–2.01)        |
| Trade/manual                          | 1.58 (0.93–2.68) | 1.31 (0.74–2.34)        | 1.13 (0.53–2.42)        |
| Other                                 | 1.25 (0.67–2.34) | 1.28 (0.66–2.49)        | 1.29 (0.56–2.98)        |
| Long working hours                    |                  |                         |                         |
| No (ref.)                             | 1.00             | 1.00                    | 1.00                    |
| Yes                                   | 1.00 (0.61–1.62) | 1.02 (0.61–1.71)        | 1.31 (0.70–2.44)        |
| Number of chronic physical conditions |                  |                         |                         |
| 0 (ref.)                              | 1.00             | 1.00                    | 1.00                    |
| 1                                     | 1.10 (0.77–1.58) | 1.16 (0.80–1.69)        | 0.78 (0.48–1.29)        |
| 2 or more                             | 1.43 (0.93–2.19) | 1.50 (0.96–2.33)        | 1.28 (0.73–2.24)        |
| Current job control                   |                  |                         |                         |
| High (ref.)                           |                  | 1.00                    | 1.00                    |
| Low                                   |                  | 1.02 (0.69–1.52)        | 1.09 (0.66–1.82)        |
| Current job demands                   |                  |                         |                         |
| Low (ref.)                            |                  | 1.00                    | 1.00                    |
| High                                  |                  | 1.15 (0.76–1.75)        | 0.95 (0.54–1.65)        |
| Current job security                  |                  |                         |                         |
| High (ref.)                           |                  | 1.00                    | 1.00                    |
| Low                                   |                  | <b>1.89 (1.31–2.72)</b> | <b>1.80 (1.12–2.90)</b> |
| Prior job control                     |                  |                         |                         |

|                    |                  |                         |
|--------------------|------------------|-------------------------|
| High (ref.)        | 1.00             | 1.00                    |
| Low                | 1.48 (1.00–2.19) | <b>1.69 (1.01–2.81)</b> |
| Prior job demands  |                  |                         |
| Low (ref.)         | 1.00             | 1.00                    |
| High               | 1.10 (0.75–1.63) | 1.24 (0.75–2.05)        |
| Prior job security |                  |                         |
| High (ref.)        | 1.00             | 1.00                    |
| Low                | 1.00 (0.66–1.51) | 0.85 (0.49–1.49)        |

Notes: <sup>a</sup> Unadjusted model (n=1447). <sup>b</sup> Model adjusted for sex, age, partner status, years of education, household income, employment mode, employment sector, occupational skill level, long working hours, and chronic physical conditions (n=1411). <sup>c</sup> Model adjusted for the covariates in model 2 and low job control, high job demands, and high job insecurity (n=1373). <sup>d</sup> Model adjusted for the covariates in model 3 and excluding those who had suicidal ideation in the previous wave (n=1224).
